# Supplementary material
Source: MDPI journal article supplement (https://www.mdpi.com/1999-4907/14/9/1846)
Supplement: s1 [file s1]

**Table S1.** Soil enzymes loadings on the first two axes of the principal component analysis. Loadings > 0.60 were shown in bold. BG:  $\beta$ -1,4-glucosidase; CB: cellobiohydrolase; NAG:  $\beta$ -1,4-N-acetyl-glucosaminidase; AcP: acid phosphatase.

|                            | PC1           | PC2          |
|----------------------------|---------------|--------------|
| Eigenvalues                | 1.77          | 1.32         |
| Proportion of variance (%) | 44.2          | 33.1         |
| Cumulative proportion (%)  | 44.2          | 77.3         |
| BG                         | 0.069         | <b>0.907</b> |
| CB                         | <b>-0.846</b> | 0.422        |
| NAG                        | 0.539         | 0.569        |
| AcP                        | <b>-0.870</b> | 0.014        |

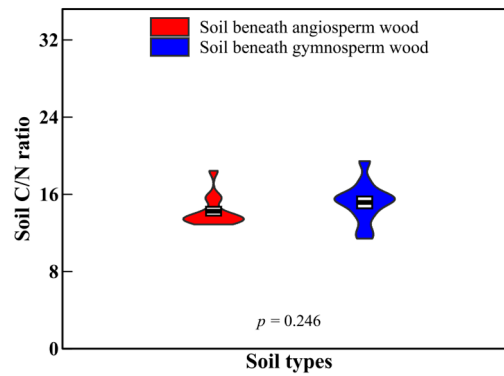

**Figure S1.** Effects of decomposing wood on soil C/N ratio. The crossbar within violin plots shows mean values  $\pm$  standard error ( $n_{\text{Soil beneath angiosperm wood}} = n_{\text{Soil beneath gymnosperm wood}} = 12$ ) of soil C/N ratio beneath decomposing angiosperm and gymnosperm wood.

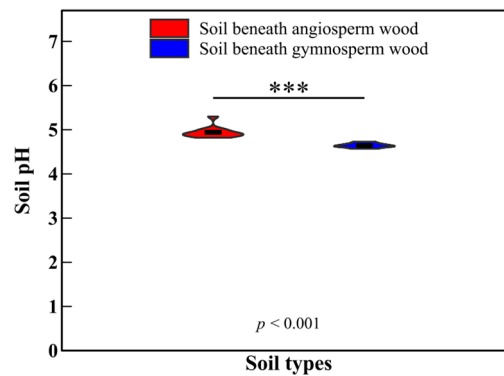

**Figure S2.** Effects of decomposing wood on soil pH. The crossbar within violin plots shows mean values  $\pm$  standard error ( $n_{\text{Soil beneath angiosperm wood}} = n_{\text{Soil beneath gymnosperm wood}} = 12$ ) of soil pH beneath decomposing angiosperm and gymnosperm wood. \*\*\*,  $p < 0.001$ .

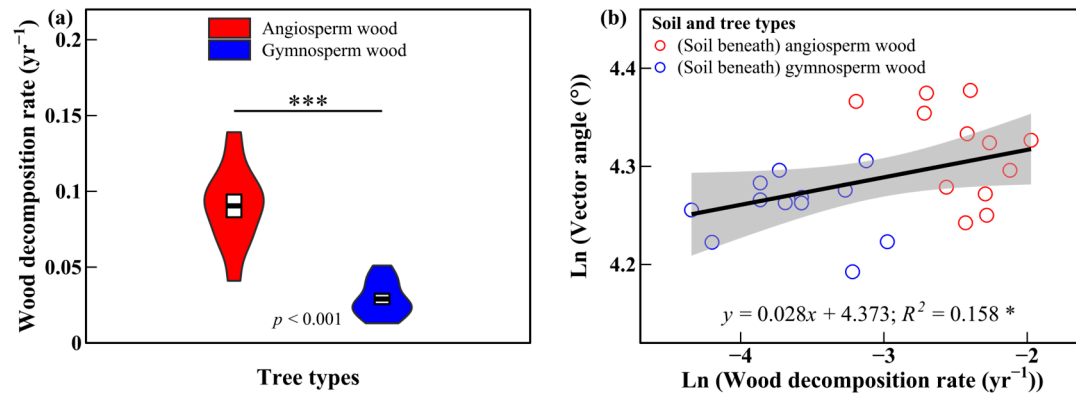

**Figure S3.** Effects of tree types on wood decomposition rate (a) and wood decomposition rate in relation to soil enzyme vector angle (b). The crossbar within violin plots shows mean values  $\pm$  standard error ( $n_{\text{Soil beneath angiosperm wood}} = n_{\text{Soil beneath gymnosperm wood}} = 12$ ) of the decomposition rate of angiosperm and gymnosperm wood. \*,  $p < 0.05$ ; \*\*\*,  $p < 0.001$ .
